# Supplementary material for: Disruption of aminergic signalling reveals novel compounds with distinct inhibitory effects on mosquito reproduction, locomotor function and survival
Source: PubMed Central journal article supplement — Sci Rep. 2014 Jul 2;4:5526. doi: 10.1038/srep05526 (PMC4078307; doi:10.1038/srep05526), 2014-07-02
Supplement: srep05526-s1.pdf [file srep05526-s1.pdf]

**Disruption of aminergic signalling reveals novel compounds with distinct inhibitory effects on mosquito reproduction, locomotor function and survival**

Silke Fuchs<sup>1</sup>, Ermelinda Rende<sup>2</sup>, Andrea Crisanti<sup>1</sup> and Tony Nolan<sup>1</sup>

<sup>1</sup>Department of Life Sciences, Imperial College London, London, UK

<sup>2</sup>Department of Pharmaco-Biology, Faculty of Pharmacy, University of Calabria, Arcavacata di Rende, Cosenza, Italy

Supplementary information

## Supplementary Figure S1

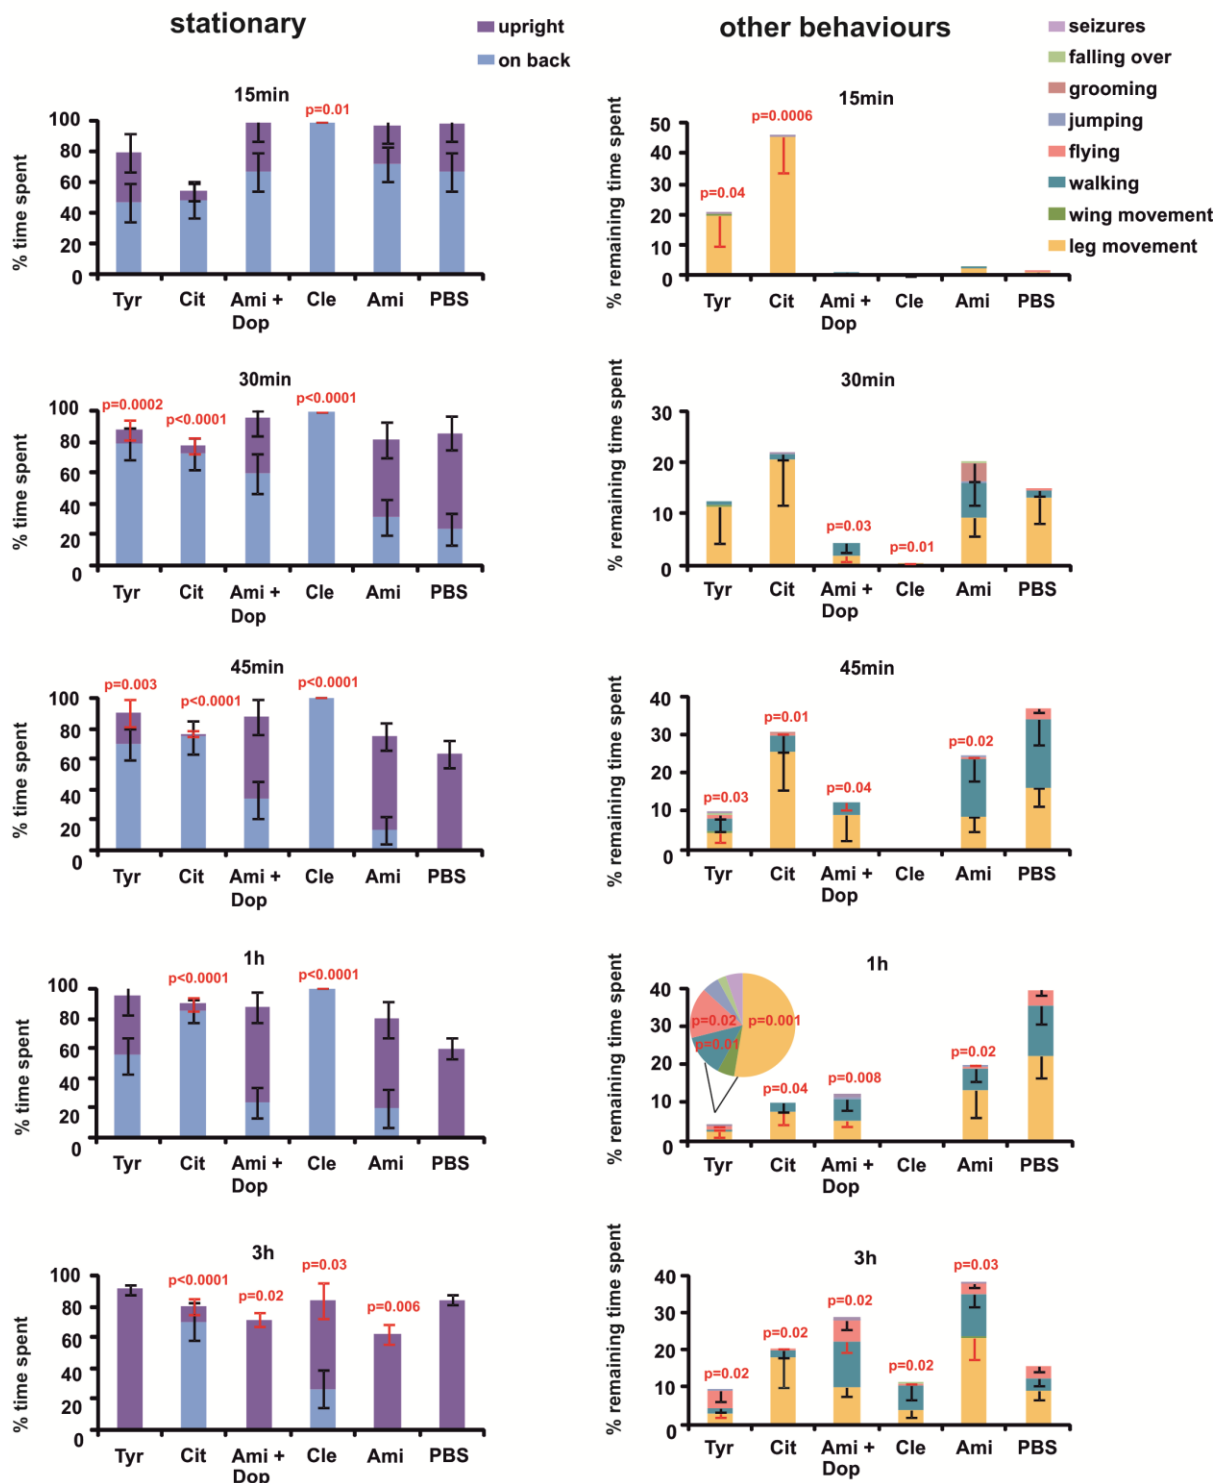

**Supplementary Figure S1: Effects of aminergic compounds on mosquito behaviour profiles.** Females were injected with either PBS (control), 80mM tyramine (Tyr), 10mM citalopram (Cit), 10mM amitriptyline (Ami), 10mM amitriptyline + 10mM dopamine (Ami +Dop) or 10mM clenbuterol (Cle) and placed in a cup lying on their back. Using video recording we monitored the behavioural responses of single mosquitoes (total N=15 for 3

experiments) at various time points (15min, 30min, 45min, 1h and 3h) for a 1 minute period after injection. The data shown represent the mean  $\pm$  SEM time (in %) a female spent for stationary (left panels: on back, upright) or any other type of behaviour (right panels). All combined behaviours add to a total of 100%. The different behaviour types were compared between PBS and compound using a Student's t-test (significance was indicated by p-value  $<0.05$  and a red error bar).

**Supplementary Table S1: Genbank accession numbers of aminergic receptors in order as illustrated in Figure 2.**

| ID         | Genbank accession number | description                                | species                        |
|------------|--------------------------|--------------------------------------------|--------------------------------|
| Dm5HT1     | CAA77570.1               | 5HT-dro2A receptor<br>(serotonin receptor) | <i>Drosophila melanogaster</i> |
| AGAP011481 | EAA13071.5               | GPR5HT1B (serotonin<br>receptor)           | <i>Anopheles gambiae</i>       |
| HsHTR1A    | NP_000515.2              | serotonin receptor 1A                      | <i>Homo sapiens</i>            |
| HsHTR7     | NP_000863.1              | serotonin receptor 7,<br>isoform a         | <i>H. sapiens</i>              |
| Dm5HT7     | NP_524599.1              | serotonin receptor 7                       | <i>D. melanogaster</i>         |
| AGAP004223 | EAA08564.1               | GPR5HT7 (serotonin<br>receptor 7)          | <i>An. gambiae</i>             |
| DmTyR1     | NP_524419.2              | octopamine-tyramine<br>receptor, isoform a | <i>D. melanogaster</i>         |
| AGAP002519 | EAA07468.3               | GPRTYR (tyramine<br>receptor)              | <i>An. gambiae</i>             |

|            |                |                                                   |                        |
|------------|----------------|---------------------------------------------------|------------------------|
| DmOA1      | NP_732541.1    | octopamine receptor in mushroom bodies, isoform a | <i>D. melanogaster</i> |
| AGAP000045 | EAA06361.5     | GPROAR1 (octopamine receptor 1)                   | <i>An. gambiae</i>     |
| Hsa2A      | NP_000672.3    | alpha-2A adrenergic receptor                      | <i>H. sapiens</i>      |
| DmOA3S     | NP_001262714.1 | CG18208, isoform c                                | <i>D. melanogaster</i> |
| AGAP000606 | EAL41154.4     | GPRNNA19 ( GPCR class a orphan receptor 19)       | <i>An. gambiae</i>     |
| Hsa1       | NP_000671.2    | alpha-1A adrenergic receptor isoform 1            | <i>H. sapiens</i>      |
| AGAP000667 | EAA06824.5     | GPRDOP2 (dopamine receptor 2)                     | <i>An. gambiae</i>     |
| DmDop2     | NP_733299.1    | dopamine receptor 2, isoform a                    | <i>D. melanogaster</i> |
| AGAP002886 | EAA08140.5     | GPRNNA2                                           | <i>An. gambiae</i>     |
| AGAP002888 | EGK96731.1     | GPRNNA3                                           | <i>An. gambiae</i>     |
| DmOA2B     | NP_651057.1    | octopamine receptor 2, isoform a                  | <i>D. melanogaster</i> |
| Hsβ1       | NP_000675.1    | beta-1 adrenergic receptor                        | <i>H. sapiens</i>      |
| HsD1       | NP_000785.1    | D(1A) dopamine receptor                           | <i>H. sapiens</i>      |

|            |                |                                        |                        |
|------------|----------------|----------------------------------------|------------------------|
| DmDop1     | CAA54451.1     | dopamine receptor                      | <i>D. melanogaster</i> |
| AGAP004613 | EAA10574.3     | GPRDOP1                                | <i>An. gambiae</i>     |
| AGAP013324 | EGK96306.1     | G-protein coupled<br>receptor GPCR     | <i>An. gambiae</i>     |
| DmTyR2     | NP_650652.1    | tyramine receptor                      | <i>D. melanogaster</i> |
| AGAP004034 | EAA05356.5     | GPRNNA4                                | <i>An. gambiae</i>     |
| DmTyR3     | NP_650651.1    | tyramine receptor 2,<br>isoform a      | <i>D. melanogaster</i> |
| DmDop3     | NP_001014758.1 | dopamine 2-like receptor,<br>isoform C | <i>D. melanogaster</i> |
| AGAP004453 | EAA09118.4     | GPRDOP3                                | <i>An. gambiae</i>     |
| HsD2       | NP_000786.1    | D(2) dopamine receptor<br>isoform long | <i>H. sapiens</i>      |
| HsHTR2A    | NP_000612.1    | serotonin receptor 2A<br>isoform 1     | <i>H. sapiens</i>      |
| Dm5HT2     | NP_524223.2    | serotonin receptor 2,<br>isoform a     | <i>D. melanogaster</i> |
| AGAP002232 | EAA03698.2     | GPR5HT2A (serotonin<br>receptor 2)     | <i>An. gambiae</i>     |
